# Supplementary material for: Covalently porphyrin-functionalized single-walled carbon nanotubes: a novel photoactive and optical limiting donor–acceptor nanohybrid
Source: Royal Society of Chemistry journal article supplement (doi:10.1039/b602349e), 2006-01-01
Supplement: b602349e.pdf [file b602349e.pdf]

Supplementary Information for B602349E

# Covalently Porphyrin-Functionalized Single-Walled Carbon Nanotubes: A Novel Photoactive and Optical Limiting Donor-acceptor Nanohybrid†

Zhen Guo<sup>a</sup>, Feng Du<sup>b</sup>, Dongmei Ren<sup>a</sup>, Yongsheng Chen<sup>\*b</sup>, Jianyu Zheng<sup>\*a</sup>, Zhibo Liu<sup>c</sup>,  
and Jianguo Tian<sup>c</sup>

---

<sup>a</sup> State Key Laboratory and Institute of Elemento-Organic Chemistry, Nankai University, Tianjin 300071, China. E-mail: [jyzheng@nankai.edu.cn](mailto:jyzheng@nankai.edu.cn); Fax: + 86 (22)-2350-5572; Tel: + 86 (22)-2350-5572

<sup>b</sup> Center for Nanoscale Science and Technology and Key Laboratory for Functional Polymer Materials, Institute of Polymer Chemistry, College of Chemistry, Nankai University, Tianjin 300071, China. E-mail: [yschen99@nankai.edu.cn](mailto:yschen99@nankai.edu.cn); Fax: + 86 (22)-2350-0693; Tel: + 86 (22)-2350-0693

<sup>c</sup> The Key Laboratory of Advanced Technique and Fabrication for Weak-Light Nonlinear Photonics Materials, Ministry of Education and TEDA Applied Physical School, Nankai University, Tianjin 300457, China

† Electronic supplementary information (ESI) available: FTIR spectra of SWNTs-TPP, Raman and UV-Vis-NIR spectra of control experiments, fluorescence spectra of TPP and SWNTs-TPP, the absorbance changes of porphyrin moiety after adding HCl. See <http://www.rsc.org/suppdata/>

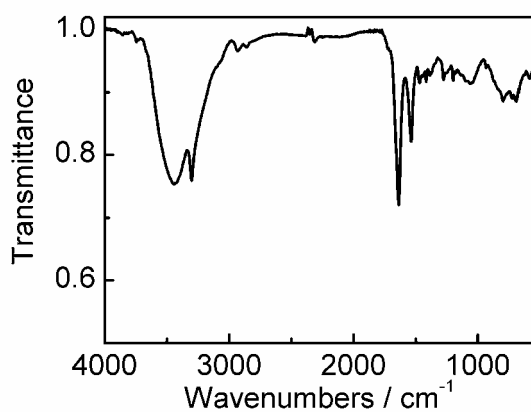

**Fig. S1** FTIR spectrum (KBr) of SWNTs-TPP.

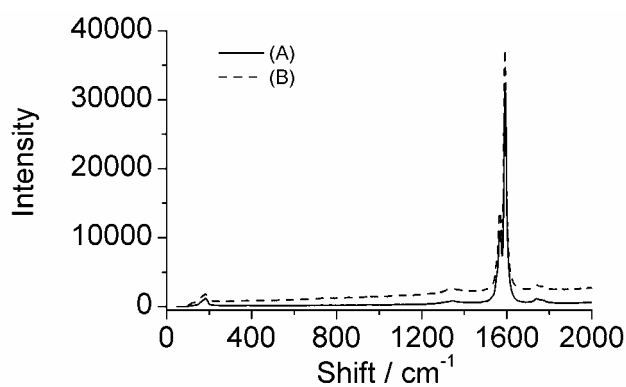

**Fig. S2** Raman spectra (514 nm excitation) of SWNTs from control experiments (A) and (B). Both control experiments were carried out in the same manner as described in experimental section.

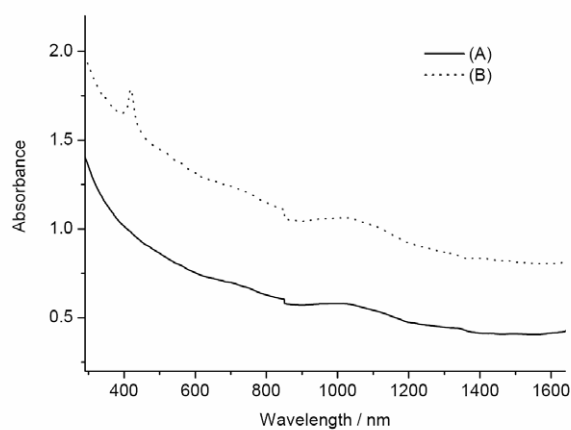

**Fig. S3** UV-Vis-NIR spectra of SWNTs from the two control experiments (A) and (B) in DMF.

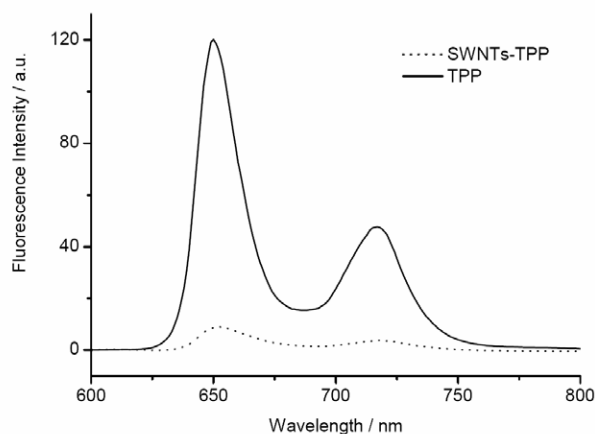

**Fig. S4** Fluorescence spectra of DMF solution of TPP (top) and SWNTs-TPP (bottom) with normalized absorbance for porphyrin moiety at the Soret band excitation wavelength, the contribution of SWNTs was subtracted.

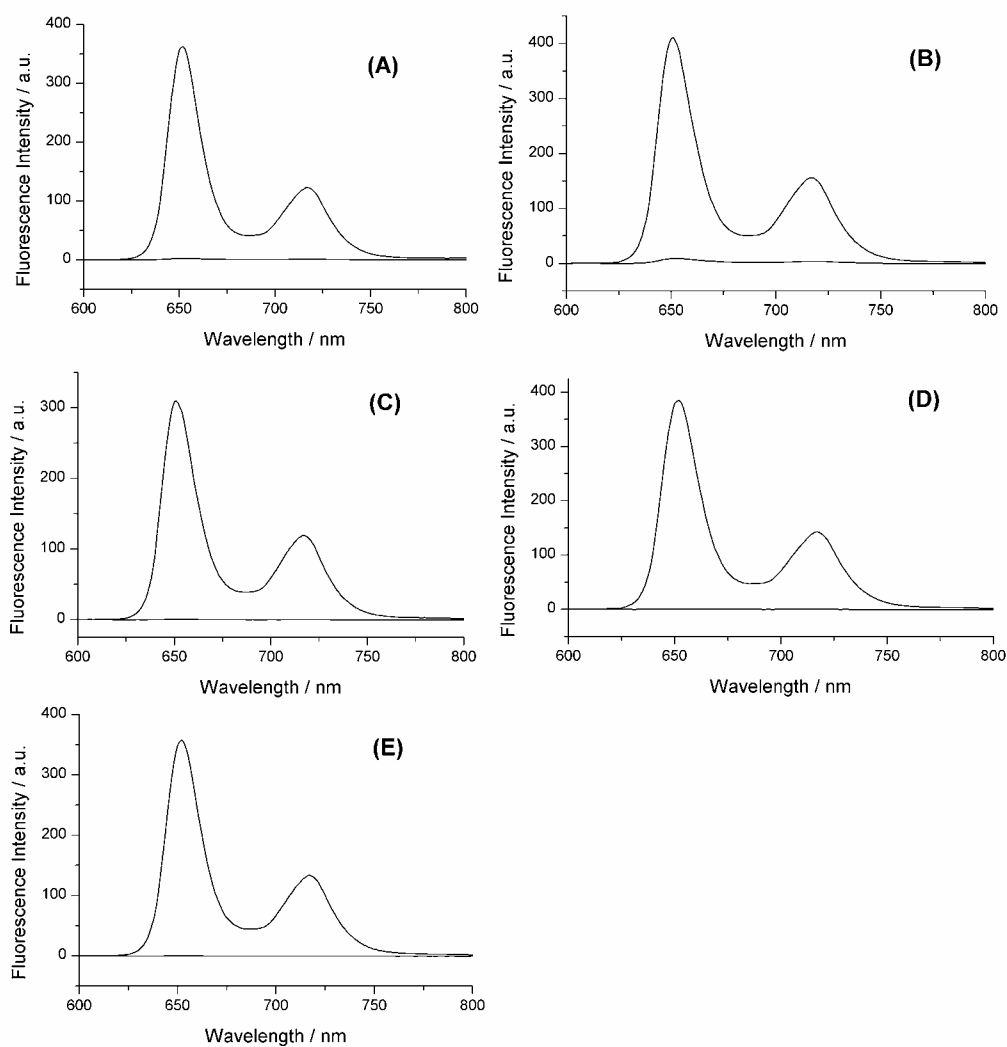

**Fig. S5** Fluorescence spectra of DMF solution of TPP (top), SWNTs-TPP (bottom) with normalized absorbance for porphyrin moiety at different excitation wavelength (A) 400nm ( $Abs_{TPP}=0.204$ ), (B) 422nm ( $Abs_{TPP}=0.255$ ), (C) 514nm ( $Abs_{TPP}=0.147$ ), (D) 521nm ( $Abs_{TPP}=0.146$ ), (E) 550nm ( $Abs_{TPP}=0.137$ ).

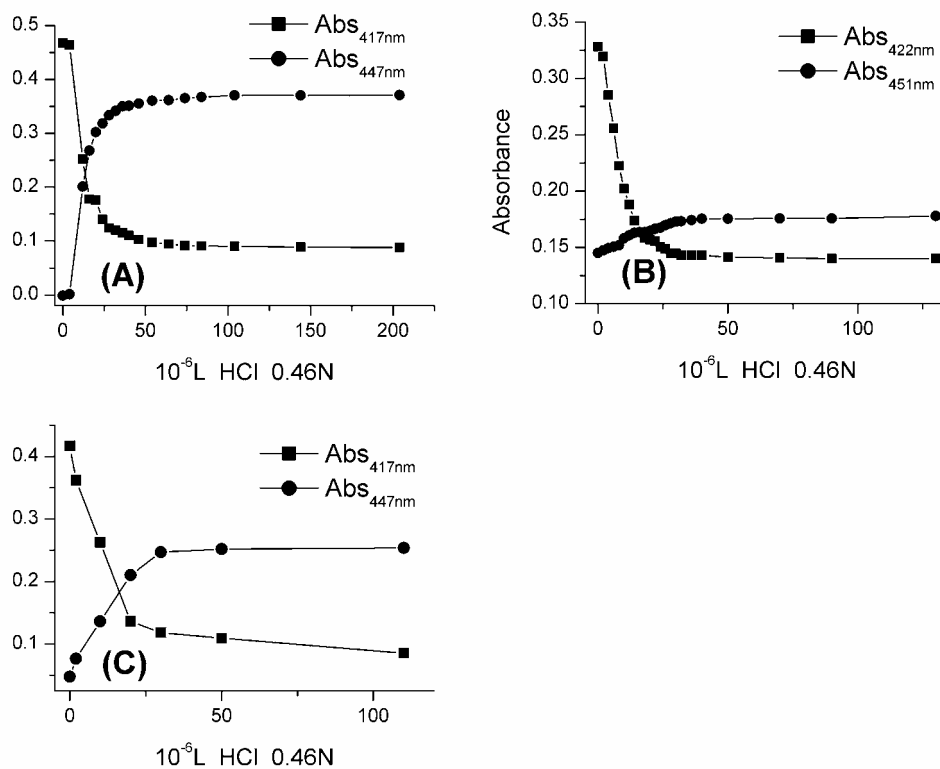

**Fig. S6** Absorbance maxima of the porphyrin free base (squares) and protonated diacid (circles) of (A) TPP, (B) SWNTs-TPP and (C) SWNTs/TPP as functions of volume of added acid (0.46 N HCl).
